# Supplementary material
Source: MDPI journal article supplement (https://www.mdpi.com/2311-7524/8/7/634)
Supplement: s1 [file s1]

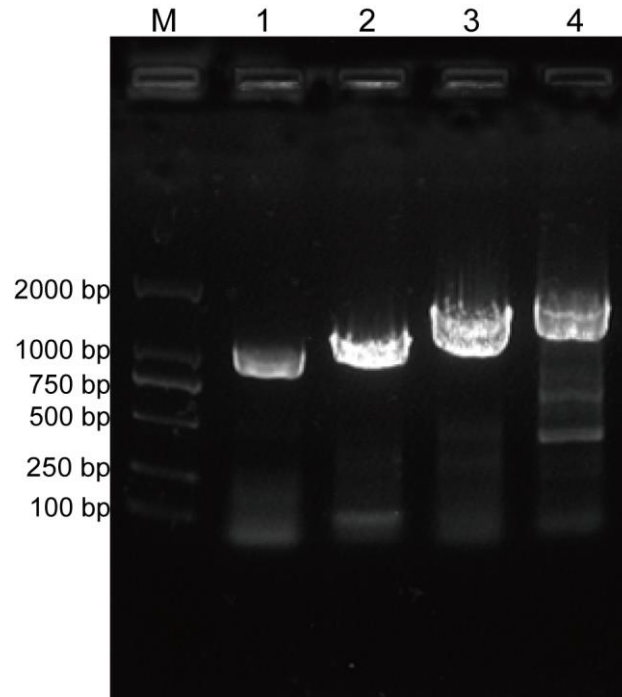

**Figure S1.** PCR amplification of CsSRO genes. M, DL ladder 2000 DNA Marker; 1, CsSRO1; 2, CsSRO2; 3, CsSRO3; 4, CsSRO4.

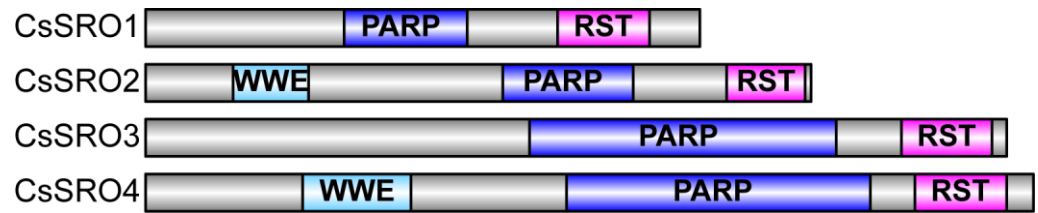

**Figure S2.** Schematic diagram of domain distributions in CsSRO proteins.

**Table S1.** The gene-specific primers used in this study.

| Gene            | Forward primer                                                   | Reverse primer                                       | Function |
|-----------------|------------------------------------------------------------------|------------------------------------------------------|----------|
| <i>CsSRO1rt</i> | cttggtaccgagctcg-gatccATGGA-GAACAATCAG-GATCAATGTC                | gatggatatctgcagaattcC-TACTCTAACAAAATT-GGTGACTCTACATT | RT-PCR   |
| <i>CsSRO2rt</i> | cttggtaccgagctcg-gatccATGGCCTCCAAGTTACTCGTGC                     | tgatggatatctgcagaattcTCATCCAC-GACTTTCACGAAATA        | RT-PCR   |
| <i>CsSRO3rt</i> | cttggtaccgagctcg-gatccATGGAAGACAA-GATCGCAAAGG                    | tgatggatatctgcagaattcTTATGGGC-TATTTGATCTCGGC         | RT-PCR   |
| <i>CsSRO4rt</i> | cttggtaccgagctcg-gatccATGGG-GAAATGGAGTGGATTGCATGACTCGGTGGTTTCGGA | tgatggatatctg-cagaattcTCAACATTCTTCCTCCTTCGGA         | RT-PCR   |
| <i>CsSRO1</i>   | TGTATGGCCGAAGAC-GAAGG                                            | ATCCCTCATTCCGCCATTCC                                 | qRT-PCR  |
| <i>CsSRO2</i>   | TCTCGTCAAGGGTCTCCCAA                                             | ACACCGATGAATTGCGGAGA                                 | qRT-PCR  |
| <i>CsSRO3</i>   | AGTCCTCTTGAACCT-GGGCG                                            | AAGGTTGACCATCGCCACAA                                 | qRT-PCR  |
| <i>CsSRO4</i>   | GGCAG-TGGTGGTGAACAT                                              | CTTTTTGGGAGCTGGCGAAG                                 | qRT-PCR  |
| <i>CsACT3</i>   |                                                                  | GATTCTGGTGATGGTGTGAGTC                               | qRT-PCR  |
